# Supplementary material
Source: HighWire-hosted journal article supplement (http://www.cmaj.ca/highwire/filestream/59137/field_highwire_adjunct_files/5/diet-salvado-4-at.pdf)
Supplement: diet-salvado-4-at.pdf [file diet-salvado-4-at.pdf]

#### Appendix 4: Olive oil and tree nut consumption during follow-up (as supplied by the authors)

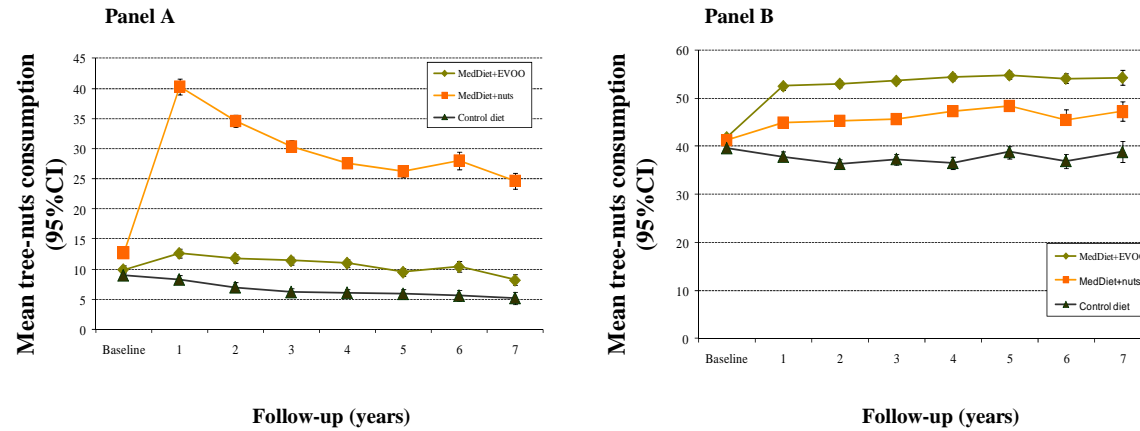

|                     | Baseline | 1 year | 2 years | 3 years | 4 years | 5 years | 6 years | 7 years |
|---------------------|----------|--------|---------|---------|---------|---------|---------|---------|
| <b>MedDiet+EVOO</b> | 1982     | 1808   | 1703    | 1626    | 1332    | 1150    | 861     | 348     |
| <b>MedDiet+nuts</b> | 1882     | 1586   | 1448    | 1336    | 1033    | 923     | 687     | 287     |
| <b>Control diet</b> | 1931     | 1392   | 1136    | 1026    | 783     | 706     | 493     | 201     |

Appendix to: Mediterranean diets and metabolic syndrome status in the PREDIMED randomized trial. Babio N, Toledo E, Estruch R, et al. *CMAJ* 2014. DOI: 10.1503/cmaj.140764. Copyright © 2014 The Author(s) or their employer(s). To receive this resource in an accessible format, please contact us at [cmajgroup@cmaj.ca](mailto:cmajgroup@cmaj.ca).
